# Supplementary material for: CRP-cAMP mediates silencing of Salmonella virulence at the post-transcriptional level
Source: PubMed Central journal article supplement (PMC5991649; doi:10.1371/journal.pgen.1007401), 2018-06-07
Supplement: pgen.1007401.s012.pdf [file pgen.1007401.s012.pdf]

**Figure S12. Compendium of uncropped images used to generate Figures 1-6 and Figure S11.**

**- Images Figure 1 (HilA-3xFLAG immunodetection)**

A. Merged image of the white light caption for detection of the molecular mass marker and the chemiluminiscence detected bands during immunodetection of HilA-3xFLAG in WT whole cell extract (OD 2.0). B. Uncropped image of the Western blot shown in Fig. 1 panel B. C. Uncropped image of the Western blot shown in Fig. 1 panel C.). D. Uncropped image of the Western blot shown in Fig. 1 panel D. An arrowhead indicate the band corresponding to SopE.

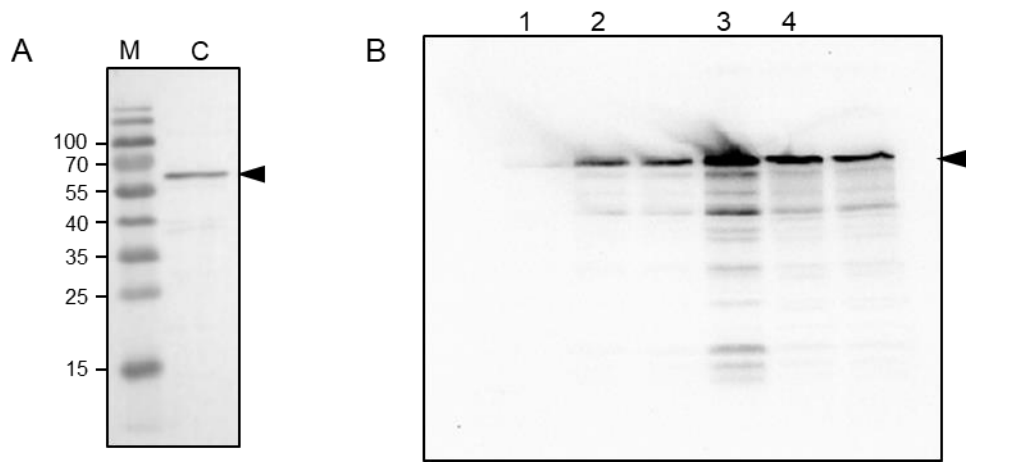

M: molecular mass marker (kDa)  
 C (control): whole cell extracts of WT strain OD 2.0

1: WT whole cell extract, OD 0.4  
 2:  $\Delta crp$  whole cell extract, OD 0.4  
 3: WT whole cell extract, OD 2.0  
 4:  $\Delta crp$  whole cell extract, OD 2.0

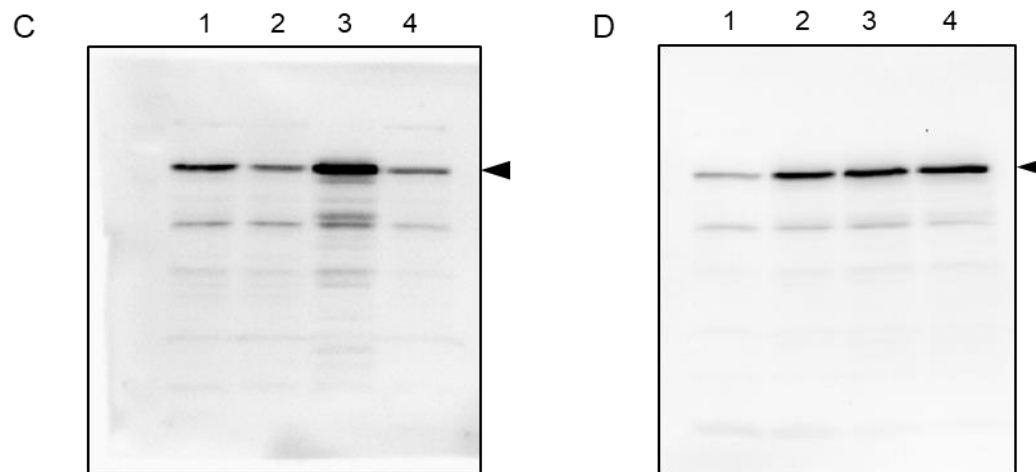

1: WT whole cell extract (- cAMP)  
 2: WT whole cell extract (+ cAMP)  
 3:  $\Delta crp$  whole cell extract (- cAMP)  
 4:  $\Delta crp$  whole cell extract (+ cAMP)

1: WT whole cell extract (- O/E CpdA)  
 2: WT whole cell extract (+ O/E CpdA)  
 3:  $\Delta crp$  whole cell extract (- O/E CpdA)  
 4:  $\Delta crp$  whole cell extract (+ O/E CpdA)

- **Image Figure 2 A (SopE immunodetection)**

Merged image of the white light caption for detection of the molecular mass marker and the chemiluminescence detected bands (uncropped Western image shown in Fig. 2 panel A). An arrowhead indicate the band corresponding to SopE.

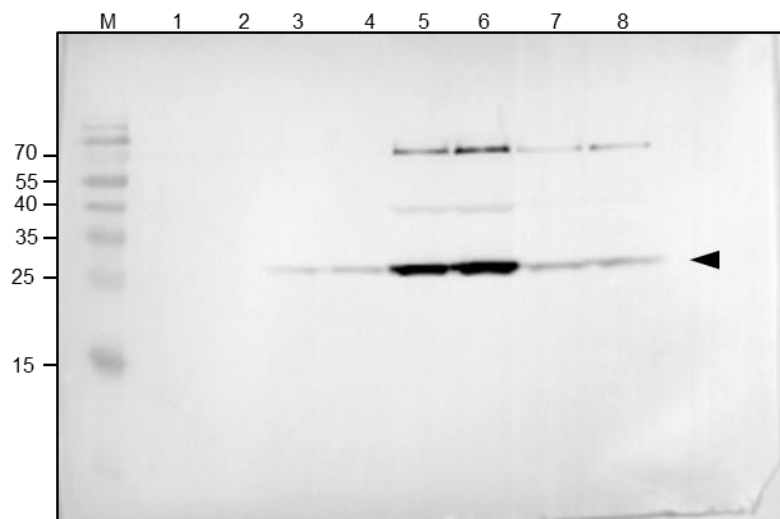

M: molecular mass marker (kDa)  
1, 2: WT secreted protein extract, OD 0.4  
3, 4:  $\Delta crp$  secreted protein extract, OD 0.4  
5, 6: WT secreted protein extract, OD 2.0  
7, 8:  $\Delta crp$  secreted protein extract, OD 2.0

- **Image Figure 2 B (SipA-3xFLAG immunodetection)**

A. Merged image of the white light caption for detection of the molecular mass marker and the chemiluminescence detected bands during immunodetection of SipA-3xFLAG in WT whole cell extract (OD 2.0).

B. Uncropped image of the Western blot shown in Fig. 2 panel B.

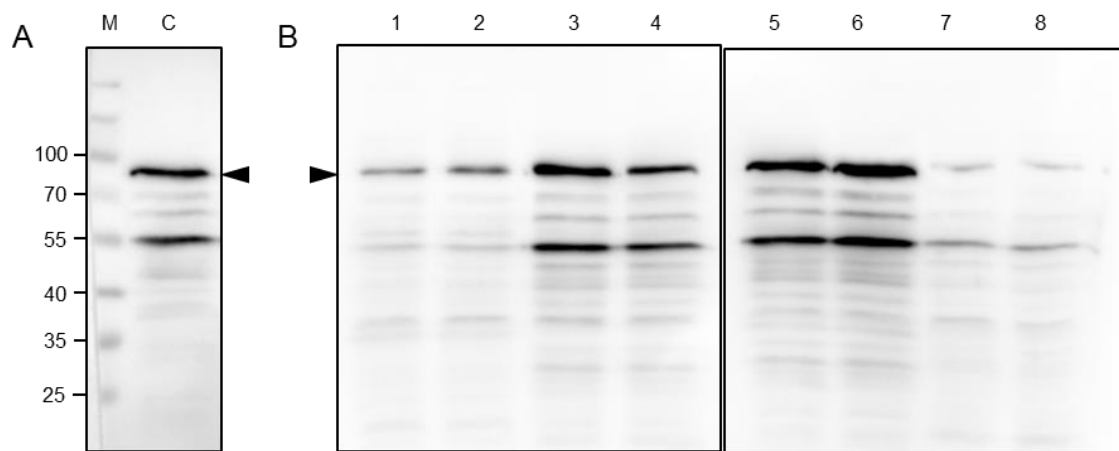

M: molecular mass marker (kDa)

1, 2: WT secreted protein extract, OD 0.4

3, 4:  $\Delta crp$  secreted protein extract, OD 0.4

5, 6: WT secreted protein extract, OD 2.0

7, 8:  $\Delta crp$  secreted protein extract, OD 2.0

- **Image Figure 3 D and Fig. S11**

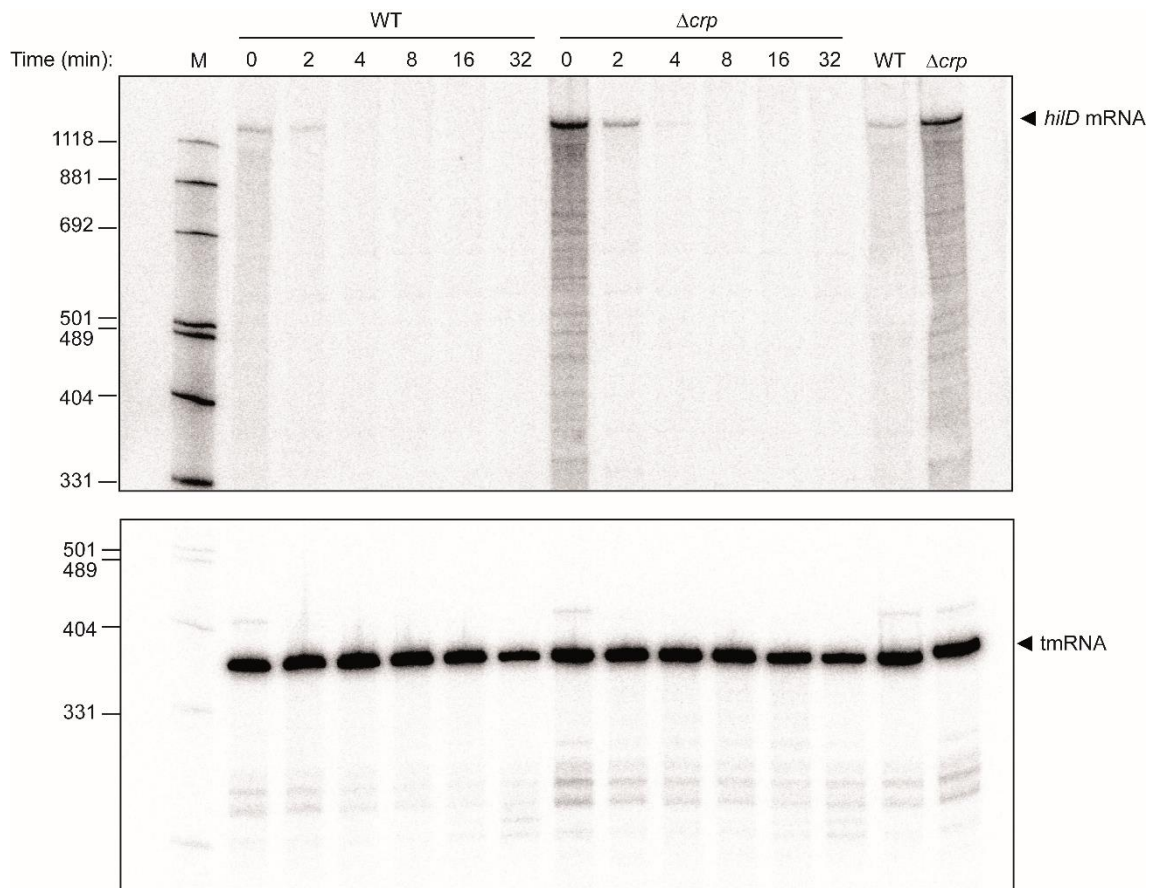

Northern blots to detect *hilD* mRNA (upper panel) and tmRNA (lower panel).

M: molecular mass marker indicated, sizes in nucleotides.

Lanes 2-13, used to generate Figure S11. Last two lanes used to generate panel Figure 3D.

- **Image Figure 4 B (HiID-3xFLAG immunodetection)**

A. Merged image of the white light caption for detection of the molecular mass marker and the chemiluminiscence detected bands during immunodetection of HiID-3xFLAG in WT whole cell extract (-UTR).

B. Uncropped image of the Western blot shown in Fig. 4 panel B.

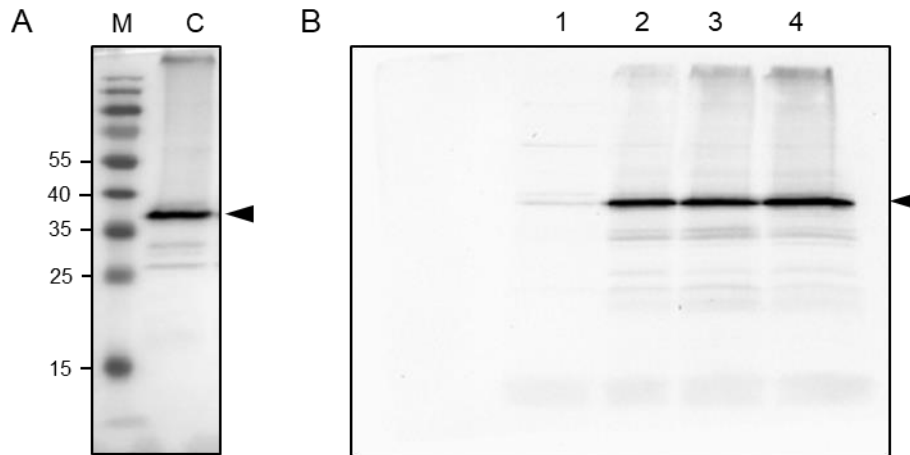

M: molecular mass marker (kDa)  
C (control): Wt whole cell extract (-UTR)

1: Wt whole cell extract (+UTR)  
2:  $\Delta crp$  whole cell extract (+UTR)  
3: Wt whole cell extract (-UTR)  
4:  $\Delta crp$  whole cell extract (-UTR)

- **Image Figure 4 C (SipA-3xFLAG immunodetection)**

Uncropped images of the Western blots shown in Fig. 4 panel C. The left image is a merged image of the white light caption for detection of the molecular mass marker and the chemiluminiscence detected bands during immunodetection of SipA-3xFLAG.

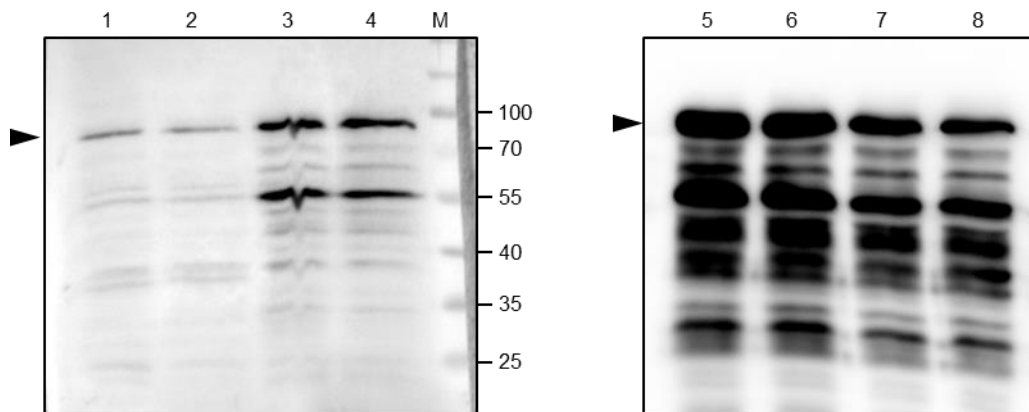

- 1, 2: Wt whole cell extract (+UTR)
- 3, 4:  $\Delta crp$  whole cell extract (+UTR)
- M: molecular mass marker (kDa)
- 5, 6: Wt whole cell extract (-UTR)
- 7, 8:  $\Delta crp$  whole cell extract (-UTR)

- **Images Figure 5 C (Northern Spot42 detection)**

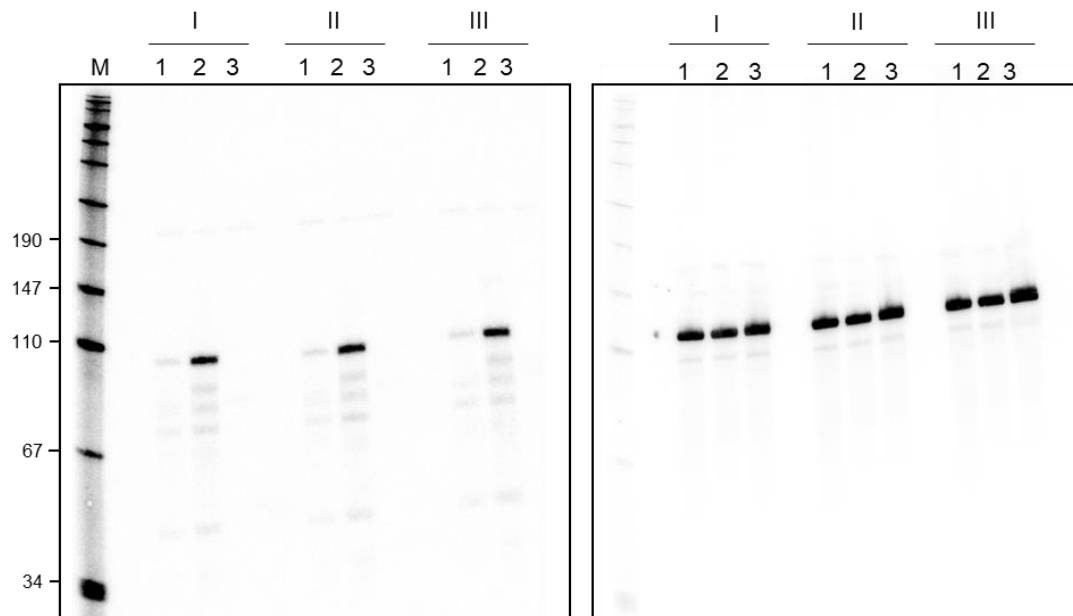

Northern blot analysis for Spot 42 sRNA (left panel) and 5S rRNA (right panel). Total RNA samples were extracted from cultures of the wild-type (1),  $\Delta crp$  (2) and  $\Delta spf$  (3) strain grown in LB at 37°C up to an  $OD_{600nm}$  of 0.4. 5S rRNA served as loading control. Samples from three independent cultures were obtained (I, II and III). M: molecular size marker in (nt).

- **Images Figure 6 Panel D (Northern Spot 42 detection)**

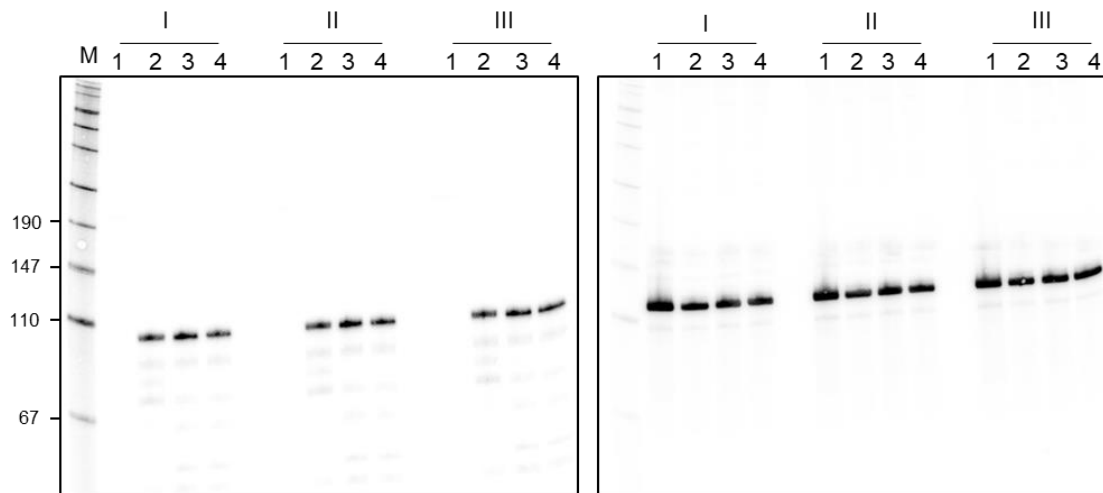

Northern blot analysis for Spot 42 sRNA (left panel) and 5S rRNA (right panel). Total RNA samples were extracted from cultures of the  $\Delta spf$  strain carrying the control vector pBRplacVC (1) or derivatives to over-express Spot 42 (2), Spot42<sup>mut1</sup> (3) and Spot 42<sup>mut2</sup> (4). Strains were grown in LB at 37°C up to an OD<sub>600nm</sub> of 0.4. Samples from three independent cultures were obtained (I, II and III). M: molecular size marker in (nt).
