# Supplementary material for: CRP-cAMP mediates silencing of Salmonella virulence at the post-transcriptional level
Source: PubMed Central journal article supplement (PMC5991649; doi:10.1371/journal.pgen.1007401), 2018-06-07
Supplement: pgen.1007401.s013.pdf [file pgen.1007401.s013.pdf]

**Table S1.** Strains and plasmids used in this work

| Strains   | Genotype                                                                | Source     |
|-----------|-------------------------------------------------------------------------|------------|
| SV5015    | <i>Salmonella enterica</i> serovar Typhimurium SL1344 His+              | [1]        |
| TGC200    | SV5015 $\Delta$ crp:frt                                                 | This study |
| TGC201    | SV5015 $\Delta$ cya:frt                                                 | This study |
| SV5015UB2 | SV5015 <i>hila-lacZ</i>                                                 | [2]        |
| TGC202    | SV5015 $\Delta$ crp:frt <i>hila-lacZ</i>                                | This study |
| JPTM7     | SV5015 <i>HilA-3xFLAG::km</i>                                           | [3]        |
| TGC203    | SV5015 $\Delta$ crp:frt <i>HilA-3xFLAG::km</i>                          | This study |
| TGC244    | SV5015 $\Delta$ cya:frt <i>HilA-3xFLAG::km</i>                          | This study |
| TGC204    | SV5015 <i>HilA-3xFLAG::km</i> pTRC99a VC                                | This study |
| TGC205    | SV5015 $\Delta$ cya:Frt <i>HilA-3xFLAG::km</i> pTRc99aVC                | This study |
| TGC206    | SV5015 <i>HilA-3xFLAG::km</i> pTRc99a CpdA                              | This study |
| TGC207    | SV5015 $\Delta$ cya:frt <i>HilA-3xFLAG::km</i> pTRc99a CpdA             | This study |
| MHS2      | SV5015 <i>SipA-3xFLAG</i>                                               | [4]        |
| TGC208    | SV5015 $\Delta$ crp:frt <i>SipA-3xFLAG</i>                              | This study |
| TGC14     | SV5015 $\Delta$ rtsa::cm <i>hila-lacZ</i>                               | This study |
| TGC209    | SV5015 $\Delta$ crp:frt $\Delta$ rtsa::cm <i>hila-lacZ</i>              | This study |
| TGC10     | SV5015 $\Delta$ hilD::cm <i>hila-lacZ</i>                               | This study |
| TGC210    | SV5015 $\Delta$ crp:frt $\Delta$ hilD::cm <i>hila-lacZ</i>              | This study |
| TGC8      | SV5015 $\Delta$ hilC:frt <i>hila-lacZ</i>                               | This study |
| TGC211    | SV5015 $\Delta$ crp:frt $\Delta$ hilC:frt <i>hila-lacZ</i>              | This study |
| TGC212    | SV5015 <i>hilC-lacZ</i>                                                 | This study |
| TGC213    | SV5015 $\Delta$ crp:frt <i>hilC-lacZ</i>                                | This study |
| TGC214    | SV5015 $\Delta$ crp:frt $\Delta$ hilD::cm <i>hilC-lacZ</i>              | This study |
| TGC35     | SV5015 <i>hilD1235-lacZ</i>                                             | This study |
| TGC215    | SV5015 $\Delta$ crp:frt <i>hilD1235-lacZ</i>                            | This study |
| TGC216    | SV5015 $\Delta$ crp:frt $\Delta$ hilC:frt <i>hilD1235-lacZ</i>          | This study |
| TH20428   | <i>Salmonella enterica</i> serovar Typhimurium LT2 <i>HilD-3xFLAG</i>   | [5]        |
| TGC217    | SV5015 <i>HilD-3xFLAG::km</i>                                           | This study |
| TGC218    | SV5015 $\Delta$ crp:frt <i>HilD-3xFLAG::km</i>                          | This study |
| TGC219    | SV5015 <i>HilD-3xFLAG:frt</i>                                           | This study |
| TGC220    | SV5015 $\Delta$ crp:frt <i>HilD-3xFLAG:frt</i>                          | This study |
| SV6190    | SV5015 <i>hilD</i> $\Delta$ UTR:km                                      | [6]        |
| TGC221    | SV5015 <i>hilD</i> $\Delta$ UTR:frt <i>SipA-3xFLAG</i>                  | This study |
| TGC222    | SV5015 $\Delta$ crp:frt <i>hilD</i> $\Delta$ UTR:frt <i>SipA-3xFLAG</i> | This study |
| TGC25     | SV5015 <i>hilD76-lacZ</i>                                               | This study |
| TGC223    | SV5015 $\Delta$ crp:frt <i>hilD76-lacZ</i>                              | This study |
| TGC38     | SV5015 <i>hilD965-lacZ</i>                                              | This study |
| TGC224    | SV5015 $\Delta$ crp:frt <i>hilD965-lacZ</i>                             | This study |
| SV5293    | 14028 $\Phi$ ( <i>sipC'</i> - <i>lacZ'</i> )                            | [7]        |
| TGC40     | SV5015 $\Phi$ ( <i>sipC'</i> - <i>lacZ'</i> )                           | This study |

|        |                                                                           |            |
|--------|---------------------------------------------------------------------------|------------|
| TGC225 | SV5015 $\Delta crp:frt \Phi(sipC'-lacZ')$                                 | This study |
| TGC226 | SV5015 $hilD\Delta UTR:frt \Phi(sipC'-lacZ')$                             | This study |
| TGC227 | SV5015 $\Delta crp:frt hilD\Delta UTR:frt \Phi(sipC'-lacZ')$              | This study |
| TGC228 | SV5015 $\Delta hfq::cm hilD1235-lacZ$                                     | This study |
| TGC229 | SV5015 $\Delta crp:frt \Delta hfq::cm hilD1235-lacZ$                      | This study |
| TGC230 | SV5015 $\Delta hfq::cm \Phi(sipC'-lacZ')$                                 | This study |
| TGC231 | SV5015 $\Delta crp:frt \Delta hfq::cm \Phi(sipC'-lacZ')$                  | This study |
| TGC232 | SV5015 $hilD965-lacZ$ pBRplacVC                                           | This study |
| TGC233 | SV5015 $hilD965-lacZ$ pBRplac Spot 42                                     | This study |
| TGC234 | SV5015 $hilD1235-lacZ$ pBRplacVC                                          | This study |
| TGC235 | SV5015 $hilD1235-lacZ$ pBRplac Spot 42                                    | This study |
| TGC236 | SV5015 $\Delta hfq::cm hilD1235-lacZ$ pBRplacVC                           | This study |
| TGC237 | SV5015 $\Delta hfq::cm hilD1235-lacZ$ pBRplac Spot 42                     | This study |
| SV5961 | SV5015 $rne537::cm$                                                       | [7]        |
| TGC254 | SV5015 $rne537::cm hilD1235-lacZ$ pBRplacVC                               | This study |
| TGC255 | SV5015 $rne537::cm hilD1235-lacZ$ pBRplac Spot 42                         | This study |
| TGC238 | SV5015 $\Phi(sipC'-lacZ')$ pBRplacVC                                      | This study |
| TGC239 | SV5015 $hilD\Delta UTR:frt \Phi(sipC'-lacZ')$ pBRplacVC                   | This study |
| TGC240 | SV5015 $\Phi(sipC'-lacZ')$ pBRplac Spot 42                                | This study |
| TGC241 | SV5015 $hilD\Delta UTR:frt \Phi(sipC'-lacZ')$ pBRplac Spot 42             | This study |
| TGC242 | SV5015 $\Delta spf::cm hilD1235-lacZ$                                     | This study |
| TGC243 | SV5015 $\Delta crp:frt \Delta spf::cm hilD1235-lacZ$                      | This study |
| TGC246 | SV5015 $\Phi(sipC'-lacZ')$ pBRplac Spot 42 <sup>Mut1</sup>                | This study |
| TGC247 | SV5015 $\Phi(sipC'-lacZ')$ pBRplac Spot 42 <sup>Mut2</sup>                | This study |
| TGC248 | SV5015 $hilDUTR^{Mut1} \Phi(sipC'-lacZ')$ pBRplacVC                       | This study |
| TGC249 | SV5015 $hilDUTR^{Mut1} \Phi(sipC'-lacZ')$ pBRplac Spot 42                 | This study |
| TGC250 | SV5015 $hilDUTR^{Mut1} \Phi(sipC'-lacZ')$ pBRplac Spot 42 <sup>Mut1</sup> | This study |
| TGC251 | SV5015 $hilDUTR^{Mut2} \Phi(sipC'-lacZ')$ pBRplacVC                       | This study |
| TGC252 | SV5015 $hilDUTR^{Mut2} \Phi(sipC'-lacZ')$ pBRplac Spot 42                 | This study |
| TGC253 | SV5015 $hilDUTR^{Mut2} \Phi(sipC'-lacZ')$ pBRplac Spot 42 <sup>Mut2</sup> | This study |

| Plasmids                        | Antibiotic resistance | Source     |
|---------------------------------|-----------------------|------------|
| pTRc99a                         | Amp <sup>R</sup>      | [8]        |
| pTRc99a CpdA                    | Amp <sup>R</sup>      | This study |
| pXG1                            | Cm <sup>R</sup>       | [9]        |
| pXG1 <i>gfp</i> -3'UTR          | Cm <sup>R</sup>       | This study |
| pBRplac                         | Amp <sup>R</sup>      | [10]       |
| pBRplac Spot 42                 | Amp <sup>R</sup>      | This study |
| pBRplac Spot 42 <sup>Mut1</sup> | Amp <sup>R</sup>      | This study |
| pBRplac Spot 42 <sup>Mut2</sup> | Amp <sup>R</sup>      | This study |

## References

1. Vivero A, Baños RC, Mariscotti JF, Oliveros JC, García-del Portillo F, Juárez A, et al. Modulation of horizontally acquired genes by the Hha-YdgT proteins in *Salmonella enterica* serovar Typhimurium. *J Bacteriol.* 2008;190: 1152–1156. doi:10.1128/JB.01206-07
2. Baños RC, Vivero A, Aznar S, García J, Pons M, Madrid C, et al. Differential regulation of horizontally acquired and core genome genes by the bacterial modulator H-NS. *PLoS Genet.* 2009;5: e1000513. doi:10.1371/journal.pgen.1000513
3. Bustamante VH, Martínez LC, Santana FJ, Knodler LA, Steele-Mortimer O, Puente JL. HILD-mediated transcriptional cross-talk between SPI-1 and SPI-2. *Proc Natl Acad Sci U S A.* 2008;105: 14591–14596. doi:10.1073/pnas.0801205105
4. Hüttener M, Dietrich M, Paytubi S, Juárez A. HilA-like regulators in *Escherichia coli* pathotypes: the YgeH protein from the enteroaggregative strain 042. *BMC Microbiol.* 2014;14: 268. doi:10.1186/s12866-014-0268-5
5. Mouslim C, Hughes KT. The effect of cell growth phase on the regulatory cross-talk between flagellar and Spi1 virulence gene expression. *PLoS Pathog.* 2014;10: e1003987. doi:10.1371/journal.ppat.1003987
6. López-Garrido J, Puerta-Fernández E, Casadesús J. A eukaryotic-like 3' untranslated region in *Salmonella enterica* *hild* mRNA. *Nucleic Acids Res.* 2014;42: 5894–5906. doi:10.1093/nar/gku222
7. López-Garrido J, Casadesús J. Regulation of *Salmonella enterica* pathogenicity island 1 by DNA adenine methylation. *Genetics.* 2010;184: 637–649. doi:10.1534/genetics.109.108985
8. Amann E, Ochs B, Abel KJ. Tightly regulated tac promoter vectors useful for the expression of unfused and fused proteins in *Escherichia coli*. *Gene.* 1988;69: 301–315.
9. Urban JH, Vogel J. Translational control and target recognition by *Escherichia coli* small RNAs in vivo. *Nucleic Acids Res.* 2007;35: 1018–1037. doi:10.1093/nar/gkl1040
10. Guillier M, Gottesman S. Remodelling of the *Escherichia coli* outer membrane by two small regulatory RNAs. *Mol Microbiol.* 2006;59: 231–247. doi:10.1111/j.1365-2958.2005.04929.x
