# Supplementary material for: CRP-cAMP mediates silencing of Salmonella virulence at the post-transcriptional level
Source: PubMed Central journal article supplement (PMC5991649; doi:10.1371/journal.pgen.1007401), 2018-06-07
Supplement: pgen.1007401.s014.pdf [file pgen.1007401.s014.pdf]

**S2 Table:** Oligonucleotides used in this work

| Primers              | Sequence                                                                                                    |
|----------------------|-------------------------------------------------------------------------------------------------------------|
| <i>crp_P1</i>        | ATGGTGCTTGGCAAACCGCAAACAGACCCGACTCTTGAATGGGTGTAGGCTGGA<br>GCTGCTTC                                          |
| <i>crp_P2</i>        | TTAGCGTGTCTTAATAACCAGACGATTACTCTGTTTTACCTCCATATGAATATCCTC<br>CTTAGT                                         |
| <i>cya_P1</i>        | TTGTACCTCTATATTGAGACTCTGAAACAGAGACTGGATGCCGTGTAGGCTGGA<br>GCTGCTTC                                          |
| <i>cya_P2</i>        | TTACGAAAAATACTGCTGCAATAGCGGCGCGTCATGATCCTGCATATGAATATCC<br>TCCTTAGT                                         |
| <i>cpdA_XbaI_Fw</i>  | CGCTCTAGAGTTTATTAGCGTCGTGAAACC                                                                              |
| <i>cpdA_Sall_Rev</i> | GCGGTTCGACATCAGTGATGGTGATGGTGATGGTATCCTTCCGAAGCGGTATC                                                       |
| <i>hilD_qPCR_Fw</i>  | GCCAGAAGAG AGGTATTTG                                                                                        |
| <i>hilD_qPCR_Rev</i> | CAGTAAGCAGGAACAGCAG                                                                                         |
| <i>hilC_qPCR_Fw</i>  | CTCACCCGCAAATGGTCAC                                                                                         |
| <i>hilC_qPCR_Rev</i> | GCCTGATTCATACGAGCATC                                                                                        |
| <i>rtsA_qPCR_Fw</i>  | GTATATTACGGCATCAGGGC                                                                                        |
| <i>rtsA_qPCR_Rev</i> | GCCTGTTTCTATTGGCGC                                                                                          |
| <i>gapA_qPCR_Fw</i>  | GTCCGTCTAAAGACAACACC                                                                                        |
| <i>gapA_qPCR_Rev</i> | CATCAGACCTTCGATGATGC                                                                                        |
| <i>hilC_P1</i>       | ATGGTATTGCCTTCAATGAATAAATCAGTTGAGGCCATTAGCGTGTAGGCTGGA<br>GCTGCTTC                                          |
| <i>hilC_P2</i>       | TCAATGGTTCATTGTACGCATAAAGCTAAGCGGTGTAATCTTCATATGAATATCCT<br>CCTTAGT                                         |
| <i>rtsA_P1</i>       | GCACATTTAATAAAAAGGAAATTATCATGCTAAAAGTATTTAATCCCTCACCGTGTA<br>GGCTGGAGCTGCTTC                                |
| <i>rtsA_P2</i>       | TCTTATACTGCATTGTCAGATATCTCAATTAACATATTGATGACGAGAGGCATATG<br>AATATCCTCCTTAGT                                 |
| <i>hilD_P1+76</i>    | ATGGAAAATGTAACCTTTGTAAGTAATAGTCATCAGCGTCCTGTGTAGGCTGGAG<br>CTGCTTC                                          |
| <i>hilD_P2+76</i>    | TTAATGGTTCGCCATTTTTATGAATGTCGATGGCGTAGTTTTTCATATGAATATCCT<br>CCTTAGT                                        |
| <i>hilD_P1+1235</i>  | GATATTGCCTTATTCACATCGTAAGAATTCGTCCAGATGACACTATCTCCGTGTAG<br>GCTGGAGCTGCTTC                                  |
| <i>hilD_P2+1235</i>  | TATAAATATGAATAAAAATGCCGGCCTTAATCCACAGGGTTAAAGCCGGAACATAT<br>GAATATCCTCCTTAGT                                |
| <i>hfq_P1</i>        | GTACAATTGAGACGTATCGTGCGCAATTTTTTCAGAATCGAGTGTAGGCTGGAGCT<br>GCTTC                                           |
| <i>hfq_P2</i>        | CCCGACATGGATAAACAGCGCGTGAACCTATTTCAGTCTCTTGATATGAATATCCTC<br>CTTA                                           |
| <i>gfp_NheI_Fw</i>   | GCGGCTAGCAAAGGAGAAGAAGACTTTTCACTGG                                                                          |
| <i>gfp_hilD_rev</i>  | CAGATACAAAAAATGTTATTTGTAGAGCTCATCC                                                                          |
| <i>hilD_gfp_Fw</i>   | GAGCTCTACAAATAACATTTTTGTATCTGTCACTTAAG                                                                      |
| <i>hilD_xbaI_rev</i> | GCGTCTAGATGCCTGGCAGAAAGCTAACAAGC                                                                            |
| <i>spf_P1</i>        | GTAATTAAGCAACATAAGCACGGGGTTTTGTGATGGGTATTGTGTAGG<br>GTCTTATCCGGCCTACGGTGTGAGCGAACTTTTCTTGCGCACATATGAATATCCT |
| <i>spf_P2</i>        | CCTTA                                                                                                       |
| <i>spf_AatII_Fw</i>  | CGCGACGTCGTAGGGTACAGAGGTAAGATGTTC                                                                           |
| <i>spf_EcoRI_Rev</i> | CGCGAATTCGTCTTATCCGGCCTACGGTG                                                                               |

|                                   |                                                   |
|-----------------------------------|---------------------------------------------------|
| <i>spf_probe</i>                  | CAAATCCGATTACGTGAAGT                              |
| <i>spf_mut1_Fw</i>                | GACCTTTTACTTCACCATATCGGATTTGGCTGAATATTTTAG        |
| <i>spf_mut1_rev</i>               | CTAAAATATTCAGCCAAATCCGATATGGTGAAGTAAAAGGTC        |
| <i>spf_mut2_Fw</i>                | GACCTTTTACTTCACGTAATCCACTTTGGCTGAATATTTTAG        |
| <i>spf_mut2_rev</i>               | CTAAAATATTCAGCCAAAGTGGATTACGTGAAGTAAAAGGTC        |
| <i>hilDUTR_xbaI_Fw</i>            | CGCTCTAGAGATAACAAGCAAAGGTTGCAGTAAC                |
| <i>hilDUTR_sacI_rev</i>           | CGCGAGCTCCTCGAAGATTTCCACTAAATGACC                 |
| <i>hilDUTR_mut1_Fw</i>            | GGTAATTTAAAGTAAGGCTGATATGATAACACGATTTTTGTG        |
| <i>hilDUTR_mut1_rev</i>           | CACAAAAATCGTGTTATCATATCAGCCTTACTTTAAATTACC        |
| <i>hilDUTR_mut2_Fw</i>            | GGTAATTTAAAGTAAGGTGGATTATATAACACGATTTTTGTG        |
| <i>hilDUTR_mut2_rev</i>           | CACAAAAATCGTGTTATATAATCCACCTTACTTTAAATTACC        |
| <i>hilDUTR_T7_fw</i>              | TAATACGACTCACTATAGGGCTACGCCATCGACATTCATAA         |
| <i>hilDUTR<sup>R</sup>_T7_Fw</i>  | TAATACGACTCACTATAGGGACAGCTTATACTGATATCTATGG       |
| <i>hilDUTR<sup>L</sup>_T7_rev</i> | CCATAGATATCAGTATAAGCTGTC                          |
| <i>hilDUTR_T7_rev</i>             | GAATAAAATGCCGGCCTTAATC                            |
| <i>Spf_T7_Fw</i>                  | TAATACGACTCACTATAGGGTAGGGTACAGAGGTAAGATG          |
| <i>Spf_T7_rev</i>                 | GTCTTATCCGGCCTACGGTG                              |
| <i>hilD_riboprobeFw</i>           | ATGGAAAATGTAACCTTTGTAAG                           |
| <i>hilD_riboprobeRev</i>          | GTTTTTTAATACGACTCACTATAGGGAGGTATATCGAAATCCATGTGGC |
| <i>tmRNA probe</i>                | TGGTGGAGCTGGCGGGAGTT                              |

---
